# Supplementary material for: Anti-Inflammatory, Antioxidant, and Skin Regenerative Potential of Secondary Metabolites from Plants of the Brassicaceae Family: A Systematic Review of In Vitro and In Vivo Preclinical Evidence (Biological Activities Brassicaceae Skin Diseases)
Source: MDPI journal article supplement (doi:10.3390/antiox11071346), 2022-07-10
Supplement: s1 [file s1]

Supplementary Material

**Table S1.** Detailed search strategy with search filters and the number of studies recovered in all electronic databases.

| Database | Descriptors                                                                                                                                                                                                                                                                                                                                                                                                                            | Items found | Time     | Date       |
|----------|----------------------------------------------------------------------------------------------------------------------------------------------------------------------------------------------------------------------------------------------------------------------------------------------------------------------------------------------------------------------------------------------------------------------------------------|-------------|----------|------------|
| Pubmed   | #1 ("brassicaceae"[MeSH Terms] OR brassicaceae[TIAB])                                                                                                                                                                                                                                                                                                                                                                                  | 74.725      | 16:34:00 | 12/04/2021 |
|          | #2 ("Skin"[MeSH terms] OR "Dermis"[MeSH terms] OR "Granulation Tissue"[MeSH terms] OR "Epidermis"[MeSH terms] OR "Keratinocytes"[MeSH terms] OR "Integumentary System"[MeSH terms] OR "Dermatology"[MeSH terms] OR "Dermoscopy"[MeSH terms] OR "Wounds and Injuries"[MeSH terms] OR "Fibrosis"[MeSH terms] OR "Skin injuries"[TIAB] OR "Skin fibrosis"[TIAB] OR "Skin scars"[TIAB] OR "Skin cicatriz"[TIAB] OR "Cicatrix"[MeSH terms]) | 1.364.344   | 16:35:00 | 12/04/2021 |
|          | #1 AND #2                                                                                                                                                                                                                                                                                                                                                                                                                              | 231         | 16:43:00 | 12/04/2021 |
| Database | Descriptors                                                                                                                                                                                                                                                                                                                                                                                                                            | Items found | Time     | Date       |
| Scopus   | #1 (TITLE-ABS-KEY("brassicaceae"))                                                                                                                                                                                                                                                                                                                                                                                                     | 10.092      | 12:44:00 | 12/04/2021 |
|          | #2 (TITLE-ABS-KEY(Skin) OR TITLE-ABS-KEY(Dermis) OR TITLE-ABS-KEY("Granulation Tissue") OR TITLE-ABS-KEY(Epidermis) OR TITLE-ABS-KEY(Keratinocyte*) OR TITLE-ABS-KEY(Integumentary System) OR TITLE-ABS-KEY(Dermatology) OR TITLE-ABS-KEY(Dermoscopy) OR TITLE-ABS-KEY(Skin wounds) OR TITLE-ABS-KEY(Skin injuries) OR TITLE-ABS-KEY(Skin fibrosis) OR (Skin cicatrix))                                                                | 1.394.680   | 12:46:00 | 12/04/2021 |
|          | #1 AND #2                                                                                                                                                                                                                                                                                                                                                                                                                              | 225         | 12:50:00 | 12/04/2021 |
| Database | Descriptors                                                                                                                                                                                                                                                                                                                                                                                                                            | Items found | Time     | Date       |
|          | #1 TS=brassicaceae                                                                                                                                                                                                                                                                                                                                                                                                                     | 7.342       | 13:11:00 | 12/04/2021 |

|                |                                                                                                                                                                                                                                  |         |          |            |
|----------------|----------------------------------------------------------------------------------------------------------------------------------------------------------------------------------------------------------------------------------|---------|----------|------------|
| Web Of Science | #2 TS=Skin OR TS=Dermis OR TS=Granulation Tissue OR TS=Epidermis OR TS=Keratinocyte* OR TS=Integumentary System OR TS=Dermatology OR TS=Dermoscopy OR TS=Skin wounds OR TS=Skin injuries OR TS=Skin fibrosis OR TS=Skin cicatrix | 737.406 | 13:13:00 | 12/04/2021 |
|                | #1 AND #2                                                                                                                                                                                                                        | 95      | 13:20:00 | 12/04/2021 |

**Table S2.** Characteristics of the experimental models used in all *in vivo* studies included in this systematic review.

| Studies <i>In vivo</i>         |                          |              |        |            |            |           |
|--------------------------------|--------------------------|--------------|--------|------------|------------|-----------|
| Reference                      | Country                  | Animal model | Strain | Sex        | Age        | Weight    |
| Alemu <i>et al.</i> , 2020     | Etiopia                  | Mice         | Swiss  | Either sex | 6-8 weeks  | 25-30g    |
| Al-Yahya <i>et al.</i> , 1994  | ?                        | Rat          | ?      | Either sex | 8-10 weeks | 180-200g  |
| Dey, 2005                      | United States of America | Rat          | Wistar | Male       | ?          | 100–200 g |
| Gonçalves <i>et al.</i> , 2013 | Brazil                   | Rat          | Wistar | Male       | ?          | 319g      |
| Ho & Chang, 2002               | Taiwan                   | Rat          | Wistar | Male       | ?          | 150–180 g |
| Leite <i>et al.</i> , 2011     | Brazil                   | Mice         | Swiss  | Male       | ?          | 20-25g    |
| Núñez <i>et al.</i> , 2017     | Peru                     | Mice         | Balb/c | Male       | 9 weeks    | ?         |
| Prabhakar <i>et al.</i> , 2002 | India                    | Rat          | Wistar | Male       | ?          | 150–250 g |
| Rebolla <i>et al.</i> , 2013   | Brazil                   | Rat          | Wistar | ?          | 8-9 weeks  | 280 g     |
| Recio <i>et al.</i> , 2005     | Spain                    | Mice         | Swiss  | Female     | ?          | 25–30 g   |
| Sarandy <i>et al.</i> , 2015   | Brazil                   | Rat          | Wistar | Male       | 8-9 weeks  | 302g      |
| Shin <i>et al.</i> , 2010      | Korea                    | Mice         | ICR    | Female     | 6 weeks    | ?         |

?, not reported.

**Table S3.** Characteristics of all *in vitro* studies included in this systematic review.

| <b>Studies <i>In vitro</i></b> |                          |                                           |                      |                       |                        |                        |
|--------------------------------|--------------------------|-------------------------------------------|----------------------|-----------------------|------------------------|------------------------|
| <b>Reference</b>               | <b>Country/Source</b>    | <b>Cells Type</b>                         | <b>Cells Lineage</b> | <b>Culture medium</b> | <b>Incubation time</b> | <b>Cell estimation</b> |
| Dey, 2005                      | ATCC                     | Monocyte/macrophage                       | RAW 264.7            | DMEM                  | 24h; 72h               | -                      |
| Kim <i>et al.</i> , 2014       | United States of America | Human keratinocytes;<br>Human fibroblasts | HaCaT/ fibroblasts   | EPI-500               | 24h                    | LPS                    |
| Mazumder <i>et al.</i> , 2015  | South Africa             | Human keratinocytes                       | HaCaT                | DMEM                  | 24h                    | -                      |
| Shin <i>et al.</i> , 2010      | Korea                    | Murine macrophages                        | RAW 264.7            | DMEM                  | 72h                    | LPS                    |
| Turkoglu <i>et al.</i> , 2018  | United States of America | Human keratinocytes                       | HaCaT                | DMEM                  | 72h                    | -                      |
| Yehuda <i>et al.</i> , 2009    | United States of America | Human keratinocytes                       | HaCaT                | DMEM                  | ?                      | LPS                    |

?, not reported. Not, Cells were not stimulated. DMEM, Dulbecco's Modified Eagle's medium. LPS, lipopolysaccharide.

**Table S4.** Characteristics of treatments administered in all *in vivo* studies *that were* identified in this systematic review.

| References                     | <i>Plant specie</i>        | Source                   | Pathology in question            | Route/application | Dose                | Control                                                                             | Duration of treatment                      |
|--------------------------------|----------------------------|--------------------------|----------------------------------|-------------------|---------------------|-------------------------------------------------------------------------------------|--------------------------------------------|
| Alemu <i>et al.</i> , 2020     | <i>Brassica carinata</i>   | North Western Ethiopia   | Wound healing                    | Topical           | 10%                 | Simple ointment (negative control); nitrofurazone skin ointment (positive control). | Once a day for 9 days                      |
| Al-Yahya <i>et al.</i> , 1994  | <i>Lepidium sativum L.</i> | ?                        | Inflammatory diseases in general | Oral              | 500 mg/kg           | Saline solution                                                                     | Single day in 0, 2 and 3h                  |
| Dey, 2005                      | <i>Lepidium apetalum</i>   | United States of America | Inflammatory diseases in general | Oral              | 200 mg/kg           | Apricot kernel balm                                                                 | Single day in 3, 5, 24 and 48 h            |
| Gonçalves <i>et al.</i> , 2013 | <i>Brassica oleracea</i>   | ?                        | Wound healing                    | Topical           | 10%                 | Saline solution                                                                     | Once a day for 20 days                     |
| Ho & Chang, 2002               | <i>Isatis indigotica</i>   | China                    | Inflammatory diseases in general | Intraperitoneal   | 1500 mg/kg          | Indometacina                                                                        | Single day in five intervals of 30 minutes |
| Leite <i>et al.</i> , 2011     | ?                          | ?                        | Inflammatory diseases in general | Topical           | 20µL/ear/kg         | Saline solution                                                                     | Single day for 6h                          |
| Núñez <i>et al.</i> , 2017     | <i>Lepidium meyenii</i>    | Peru                     | Wound healing                    | Topical           | 0,08% (160ug/200mg) | Silver sulfadiazine                                                                 | Once a day for 3 days                      |

|                                |                                        |         |                                  |         |                   |                          |                                   |
|--------------------------------|----------------------------------------|---------|----------------------------------|---------|-------------------|--------------------------|-----------------------------------|
|                                |                                        |         |                                  |         |                   | cream (positive control) |                                   |
| Prabhakar <i>et al.</i> , 2002 | <i>Coronopus didymus</i>               | India   | Inflammatory diseases in general | Oral    | 200 mg/kg         | ?                        | Single day in 1, 2 and 3h         |
| Rebolla <i>et al.</i> , 2013   | <i>Brassica oleracea var. capitata</i> | ?       | Wound healing                    | Topical | 10%               | Saline solution          | Twice a day for seven and 16 days |
| Recio <i>et al.</i> , 2005     | <i>Isatis tinctoria</i>                | Germany | Dermatitis                       | Topical | 125 and 175 mg/kg | Acetone                  | Twice daily for 4 days            |
| Sarandy <i>et al.</i> , 2015   | <i>Brassica oleracea var. capitata</i> | ?       | Wound healing                    | Topical | 10%               | Saline solution          | Once a day for 20 days            |
| Shin <i>et al.</i> , 2010      | <i>Radix Isatidis</i>                  | Korea   | Inflammatory diseases in general | Topical | 5 mg/ear/kg       | $\beta$ -actin           | Every 24 h for 3 days             |

**Table S5.** Characteristics of treatments administered in all *in vitro* studies that were identified in this systematic review.

| References                    | Plant specie               | Source                   | Dose                                | Period of incubation |
|-------------------------------|----------------------------|--------------------------|-------------------------------------|----------------------|
| Dey, 2005                     | <i>Lepidium apetalum</i>   | United States of America | 50 µg/mL                            | 9 and 21h            |
| Kim <i>et al.</i> , 2014      | <i>Eruca sativa</i>        | Korea                    | 20 µg/mL and 100 µg/mL              | 24h                  |
| Mazumder <i>et al.</i> , 2015 | ?                          | Germany                  | 70 µg/mL and 140µg/mL               | 24h                  |
| Shin <i>et al.</i> , 2010     | <i>Radix Isatidis</i>      | Korea                    | 0-500µg/mL                          | 24h; 72h.            |
| Turkoglu <i>et al.</i> , 2018 | <i>Lepidium sativum L.</i> | Turkey                   | 1:1, 1:10, 3:100, 1:100, and 1:1000 | 72h                  |
| Yehuda <i>et al.</i> , 2009   | <i>Eruca sativa</i>        | Italy                    | 1 µg/mL                             | 72h                  |

?, not reported.

**Table S6.** Characteristics of skin changes from *in vivo* studies identified in the systematic review.

| Type of change: Wound healing  |                           |                             |                  |        |                       |                             |
|--------------------------------|---------------------------|-----------------------------|------------------|--------|-----------------------|-----------------------------|
| Reference                      | Lesion                    | Size area of wound          | Number of wounds | Region | Anesthetic            | Instrument                  |
| Rebolla <i>et al.</i> , 2013   | Excisional                | 30mm                        | ?                | Dorsal | Ketamine and xylazine | Surgical scalpel            |
| Alemu <i>et al.</i> , 2020     | Incisional and excisional | 30mm and 300mm <sup>2</sup> | ?                | Dorsal | Ketamine and diazepam | Forceps and surgical blades |
| Sarandy <i>et al.</i> , 2015   | Excisional                | 12 mm                       | 3                | Dorsal | Ketamine and xylazine | Surgical scalpel            |
| Núñez <i>et al.</i> , 2017     | Excisional                | 10mm                        | 2                | Dorsal | Sodium pentobarbital  | ?                           |
| Gonçalves <i>et al.</i> , 2013 | Excisional                | 12 mm                       | 5                | Dorsal | Ketamine and xylazine | Surgical scalpel            |

?, not reported.

**Table S6 (continuation).** Characteristics of skin changes from *in vivo* studies identified in the systematic review.

| <b>Type of change: Edema/Inflammatory</b> |                                                       |                |                                                 |                                                 |
|-------------------------------------------|-------------------------------------------------------|----------------|-------------------------------------------------|-------------------------------------------------|
| <b>Reference (animal model)</b>           | <b>Edema/Inflammation Induction</b>                   | <b>Region</b>  | <b>Time of treatment exposure</b>               | <b>Edema measurement</b>                        |
| Al-Yahya <i>et al.</i> , 1994             | Carrageenan-induced                                   | Right hind paw | 1h before the carrageenan                       | 0, 2 and 3 h                                    |
| Dey, 2005                                 | Carrageenan-induced                                   | Right hind paw | 1h after the carrageenan                        | 3, 5, 24 and 48h                                |
| Ho & Chang, 2002                          | Carrageenan-induced                                   | Right hind paw | 30min before the carrageenan                    | Single day of 30-min intervals up to five times |
| Leite <i>et al.</i> , 2011                | Croton oil; Arachidonic acid; Capsaicin; Indomethacin | Ear            | 6h after the application of each irritant agent | 30min; 1h; 6h                                   |
| Prabhakar <i>et al.</i> , 2002            | Carrageenan-induced                                   | Right hind paw | 1h before the carrageenan                       | 0, 1, 2 and 3 h                                 |
| Recio <i>et al.</i> , 2005                | Carrageenan-induced                                   | Right hind paw | 1h before the carrageenan                       | 1, 3 and 5 h                                    |
| Shin <i>et al.</i> , 2010                 | Multiple application of TPA                           | Ear            | 1h after TPA                                    | Every 24 h for 3 days                           |

TPA: 12-O-tetradecanoylphorbol-13-acetate.

Filename: antioxidants-1744864-supplementary.docx  
Directory: C:\Users\MDPI\Documents  
Template: C:\Users\MDPI\AppData\Roaming\Microsoft\Templates\Normal.dotm  
Title: Type of the Paper (Article  
Subject:  
Author: MDPI  
Keywords:  
Comments:  
Creation Date: 5/13/2022 9:08:00 AM  
Change Number: 5  
Last Saved On: 6/25/2022 12:36:00 PM  
Last Saved By: MDPI  
Total Editing Time: 23 Minutes  
Last Printed On: 7/7/2022 2:01:00 PM  
As of Last Complete Printing  
Number of Pages: 7  
Number of Words: 1,134 (approx.)  
Number of Characters: 6,468 (approx.)
